# Supplementary material for: Lack of the ventral anterior homeodomain transcription factor VAX1 leads to induction of a second pituitary
Source: Oxford University Press journal article supplement (doi:10.1242/dev.056465), 2011-01-20
Supplement: dev056465tables1.pdf [file dev056465tables1.pdf]

**Table S1. Primers**

| Number | ChIP primers – <i>Fgf10</i> promoter                                                                                                                                                                                                                                                              | Amplicon position                                                               |
|--------|---------------------------------------------------------------------------------------------------------------------------------------------------------------------------------------------------------------------------------------------------------------------------------------------------|---------------------------------------------------------------------------------|
| 1      | For: 5'-acctccttgaagctggcagg-3'<br>Rev: 5'-atgtgttctgccttccagatcc-3'                                                                                                                                                                                                                              | -804 to -625                                                                    |
| 2      | For: 5'-tcatttgcgccaagagagagg-3'<br>Rev: 5'-ccagctccaaggaggctctcg-3'                                                                                                                                                                                                                              | -942 to -788                                                                    |
| 3      | For: 5'-ggcttctggggctaagctaagagg-3'<br>Rev: 5'-ccaaaggaaaagctgacatagcttttag-3'                                                                                                                                                                                                                    | -2765 to -2644                                                                  |
| 4      | For: 5'-gaagtaactgagaatgattcagg-3'<br>Rev: 5'-agcctgagaaaagttccacagg-3'                                                                                                                                                                                                                           | -2899 to -2761                                                                  |
| 5      | For: 5'-gggtaccattctaactgaagc-3'<br>Rev: 5'-gactgaaattctacctactctcc-3'                                                                                                                                                                                                                            | -3032 to -2889                                                                  |
|        | <b>Cloning primers – WT <i>Fgf10</i> promoter</b>                                                                                                                                                                                                                                                 | <b>Cloning site</b>                                                             |
|        | For: 5'-atctggagctcattctgcccattcaatctaacag-3'<br>Rev: 5'-ctgctaagcttcttgggcgagaggagtggc-3'                                                                                                                                                                                                        | <i>SacI</i><br><i>HindIII</i>                                                   |
|        | <b>Cloning strategy – del (HD6-9) <i>Fgf10</i> promoter</b>                                                                                                                                                                                                                                       |                                                                                 |
|        | Wild-type promoter was cut at <i>SacI</i> and <i>StuI</i> restriction sites, which flank homeodomain-binding sites sites 6-9. The cut construct was end filled by T4 DNA polymerase for blunt-end cloning, resulting in a construct that contains a small 131 bp deletion and lacks HD sites 6-9. | <i>SacI</i><br><i>StuI</i><br>T4 DNA polymerase filled in and blunt end ligated |
